# Supplementary material
Source: ML conference proceedings conference paper supplement (https://openreview.net/forum?id=7ZQiucQu2u)
Supplement: supplementary_material [file attachment]

## 580 7 Appendix

### 581 7.1 Score matching details

582 We found that using score matching [32] does not work reliably when the data’s structure lies on a  
583 low-dimensional manifold (e.g., natural images). We found that applying randomized smoothing [56],  
584 which adds Gaussian noise to the image for robust training, helps stabilize score matching as it  
585 smoothens the density function. Randomized smoothing also makes the bound tighter. We observed  
586 that adding a reasonable amount of noise (e.g., standard deviation of 0.25, which was originally used  
587 by Cohen et al. [56]) works well in general, but adding only small noise (standard deviation of 0.01)  
588 does not. We show both results in Section 3.3.1.

### 589 7.2 Hyperparameters

590 **Attacks** For attacks in Section 3.3.1, 3.3.2, and 4.2, we used the following hyperparameters. For  
591 the optimizer-based attack for Gaussian synthetic input, we used Adam with  $\text{lr}=10^{-3}$ , and  $\lambda=0.1-100$   
592 for the regularizer. For the optimizer-based attack for NCF-MLP and DistilBert, we used Adam with  
593  $\text{lr}=0.1$ . For the DNN-based attack for MNIST and CIFAR-10 (Figure 2, 3, 5), we used a modified  
594 DNN from Li et al. [20], which uses a series of convolution (Conv) and convolution transpose (ConvT)  
595 layers interspersed with leaky ReLU of slope 0.2. All the models were trained for 100 epochs using  
596 Adam with  $\text{lr}=10^{-3}$ . Below summarizes the architecture parameters. For DNN-based attacks in  
597 Section 3.3.2 we put a sigmoid at the end. For the attack in Section 4.2 we do not.

Table 3: DNN attacker architectures used in the paper. Output channel dimension ( $c_{out}$ ), kernel size (k), stride (s), and output padding (op) are specified. Input padding was 1 for all layers.

| Dataset + encoder       | Architecture                                                                                                                                                    |
|-------------------------|-----------------------------------------------------------------------------------------------------------------------------------------------------------------|
| MNIST + Conv            | $3 \times \text{Conv}(c_{out}=16, k=3, s=1) + \text{ConvT}(c_{out}=32, k=3, s=1, \text{op}=0)$<br>$+ \text{ConvT}(c_{out}=1, k=3, s=1, \text{op}=0)$            |
| CIFAR-10 + split-early  | $3 \times \text{Conv}(c_{out}=64, k=3, s=1) + \text{ConvT}(c_{out}=128, k=3, s=1, \text{op}=0)$<br>$+ \text{ConvT}(c_{out}=3, k=3, s=1, \text{op}=0)$           |
| CIFAR-10 + split-middle | $3 \times \text{Conv}(c_{out}=128, k=3, s=1) + \text{ConvT}(c_{out}=128, k=3, s=2, \text{op}=1)$<br>$+ \text{ConvT}(c_{out}=3, k=3, s=2, \text{op}=1)$          |
| CIFAR-10 + split-late   | $3 \times \text{Conv}(c_{out}=256, k=3, s=1) + 2 \times \text{ConvT}(c_{out}=256, k=3, s=2, \text{op}=1)$<br>$+ \text{ConvT}(c_{out}=3, k=3, s=2, \text{op}=1)$ |

598 **Split inference** Below are the hyperparameters for the models used in Section 4.2. For ResNet-18,  
599 we used an implementation tuned for CIFAR-10 dataset from [70], with ReLU replaced with GELU  
600 and max pooling replaced with average pooling. We used the default hyperparameters from the  
601 repository except for the following:  $\text{bs}=128$ ,  $\text{lr}=0.1$ , and  $\text{weight\_decay}=5 \times 10^{-4}$ . For NCF-MLP,  
602 we used an embedding dimension of 32 and MLP layers of output size [64, 32, 16, 1]. We trained  
603 NCF-MLP with Nesterov SGD with momentum=0.9,  $\text{lr}=0.1$ , and batch size of 128 for a single epoch.  
604 We assumed 5-star ratings as click and others as non-click. For DistilBert, we used Adam optimizer  
605 with a batch size of 16,  $\text{lr}=2 \times 10^{-5}$ ,  $\beta_1=0.9$ ,  $\beta_2=0.999$ , and  $\epsilon = 10^{-8}$ . We swept the compression  
606 layer channel dimension among 2, 4, 8, 16, and the SNR regularizer  $\lambda$  between  $10^{-3}$  and 100.

607 **Training** Below are the hyperparameters for the models evaluated in Section 5.2. We used the  
608 same model and hyperparameters with split inference for training the encoder with the pretraining  
609 dataset. Then, we freeze the layers up to block 4 and trained the rest for 10 epochs with CIFAR-10,  
610 with  $\text{lr}=10^{-3}$  and keeping other hyperparameters the same.

611 **Execution Environment** All the evaluation was done on a single A100 GPU. The training and  
612 evaluation of each model ranged roughly from less than an hour (ResNet-18 with split-early, NCF-  
613 MLP) to 3–7 hours (ResNet-18 with split-late, DistilBert).

### 614 7.3 van Trees inequality

615 Below, we restate the van Trees Inequality [67], which we use to prove Theorem 5

616 **Theorem 2** (Multivariate van Trees inequality). Let  $(\mathcal{X}, \mathcal{F}, P_\theta : \theta \in \Theta)$  be a family of distributions  
617 on a sample space  $\mathcal{X}$  dominated by  $\mu$ . Let  $p(\mathbf{x}|\theta)$  denote the density of  $X \sim P_\theta$  and  $\mathcal{I}_x(\theta)$  denotes  
618 its FIM. Let  $\theta \in \Theta$  follows a probability distribution  $\pi$  with a density  $\lambda_\pi(\theta)$  with respect to Lebesgue  
619 measure. Suppose that  $\lambda_\pi$  and  $p(\mathbf{x}|\theta)$  are absolutely  $\mu$ -almost surely continuous and  $\lambda_\pi$  converges  
620 to 0 and the endpoints of  $\Theta$ . Let  $\psi$  be an absolutely continuous function of  $\theta$ , and  $\psi_n$  an arbitrary  
621 estimator of  $\psi(\theta)$ . Assume regularity conditions from Section 2.2 is met. If we make  $n$  observations  
622  $\{\mathbf{x}_1, \mathbf{x}_2, \dots, \mathbf{x}_n\}$ , then:

$$\int_{\Theta} \mathbb{E}_\theta[\|\psi_n - \psi(\theta)\|_2^2] \lambda_\pi(\theta) d\theta \geq \frac{(\int \text{div } \psi(\theta) \lambda_\pi(\theta) d\theta)^2}{n \int \text{Tr}(\mathcal{I}_x(\theta)) \lambda_\pi(\theta) d\theta + \text{Tr}(\mathcal{J}(\lambda_\pi))},$$

623 where  $\text{div}$  is the divergence operator.

## 624 7.4 Proof of Corollary 1

625 *Proof.* Let  $\psi$  be an identity transformation  $\psi(\theta) = \theta$ . For the setup in Corollary 1,  $n = 1$  and  
626  $\text{div}(\mathbf{x}) = d$ , so the multivariate van Trees inequality from Theorem 2 reduces to:

$$\mathbb{E}_\pi \mathbb{E}_\theta[\|\hat{\mathbf{x}} - \mathbf{x}\|_2^2/d] \geq \frac{d}{\mathbb{E}_\pi[\text{Tr}(\mathcal{I}_e(\mathbf{x}))] + \text{Tr}(\mathcal{J}(f_\pi))} = \frac{1}{\mathbb{E}_\pi[\text{dFIL}(\mathbf{x}) + \text{Tr}(\mathcal{J}(f_\pi))]/d}$$

627

□

## 628 7.5 Comparison with differential privacy

629 Differential privacy [42] is not well-suited for instance encoding, as we discuss in Section 2.1. We  
630 formulate and compare a DP-based instance encoding and compare it with our dFIL-based instance  
631 encoding in a split inference setup (Section 4) to show that DP-based instance encoding indeed does  
632 not work well.

633 To formulate DP for instance encoding, we define an adjacent set  $\mathcal{D}$  and  $\mathcal{D}'$  as two differing inputs.  
634 A randomized method  $\mathcal{A}$  is  $(\alpha, \epsilon)$ -Rényi differentially private (RDP) if  $D_\alpha(\mathcal{A}(\mathcal{D})||\mathcal{A}(\mathcal{D}')) \leq \epsilon$  for  
635  $D_\alpha(P||Q) = \frac{1}{\alpha-1} \log \mathbb{E}_{x \sim Q}[(\frac{P(x)}{Q(x)})^\alpha]$ . As DP provides a different privacy guarantee with dFIL, we  
636 use the theorem from Guo et al. [28] to derive an MSE lower bound using DP's privacy metric for  
637 an unbiased attacker. Assuming a reconstruction attack  $\hat{\mathbf{x}} = \text{Att}(\mathbf{e})$  that reconstructs  $\mathbf{x}$  from the  
638 encoding  $\mathbf{e} = \text{Enc}(\mathbf{x})$ , repurposing the theorem Guo et al. [28] gives:

$$\mathbb{E}[\|\hat{\mathbf{x}} - \mathbf{x}\|_2^2/d] \geq \frac{\sum_{i=1}^d \text{diam}_i(\mathcal{X})^2/4d}{e^\epsilon - 1} \quad (6)$$

639 for a  $(2, \epsilon)$ -RDP  $\text{Enc}$ , where  $\mathcal{X}$  is the input data space. We can construct a  $(2, \epsilon)$ -RDP encoder  
640  $\text{Enc}_{RDP}$  from a deterministic encoder  $\text{Enc}_D$  by scaling and clipping the encoding adding Gaussian  
641 noise, or  $\text{Enc}_{RDP} = \text{Enc}_D(\mathbf{x}) / \max(1, \frac{\|\text{Enc}_D(\mathbf{x})\|_2}{C}) + \mathcal{N}(0, \sigma^2)$ , similarly to [42]. The noise to be  
642 added is  $\sigma = \frac{(2C)^2}{\epsilon}$  [71]. Equation 6 for DP is comparable to Equation 2 for dFIL, and we use the  
643 two equations to compare DP and dFIL parameters. We use Equation 2 because [28] does not discuss  
644 the bound against biased attackers.

645 We evaluate both encoders for split inference using CIFAR-10 dataset and ResNet-18. We split the  
646 model after block 4 (split-middle from Section 4.2.1) and did not add any optimizations discussed  
647 in Section 4 for simplicity. For the DP-based encoder, we retrain the encoder with scaling and  
648 clipping so that the baseline accuracy without noise does not degrade. We ran both models without  
649 standardizing the input, which makes  $\text{diam}_i(\mathcal{X}) = 1$  for all  $i$ .

650 Table 4 compares the test accuracy achieved when targeting the same MSE bound for an unbiased  
651 attacker using dFIL and DP, respectively. The result clearly shows that DP degrades the accuracy  
652 much more for similar privacy levels (same unbiased MSE bound), becoming impractical very  
653 quickly. DP suffers from low utility because DP is agnostic with the input and the model, assuming a  
654 worst-case input and model weights. Our dFIL-based bound uses the information of the input and  
655 model weights in its calculation of the bound and can get a tighter bound.

Table 4: Test accuracy when targeting the same MSE bound.

| Unbiased MSE bound | 1e-5          | 1e-4          | 1e-3          | 1e-2          |
|--------------------|---------------|---------------|---------------|---------------|
| dFIL-based         | <b>93.09%</b> | <b>93.11%</b> | <b>92.52%</b> | <b>87.52%</b> |
| DP-based           | 64.64%        | 56.68%        | 46.46%        | 33%           |

## 656 7.6 Attack based on a diffusion model

657 We additionally designed a powerful, diffusion model-based reconstruction attacker to study the  
 658 privacy of dFIL against the best-effort attacker, motivated from the fact that recently developed  
 659 diffusion models [72] are excellent denoisers. During training of a diffusion model, (1) a particularly-  
 660 designed noise is added to an image, and (2) a DNN is trained to predict and remove the noise [72].  
 661 The first part can be thought of as an instance encoder (that is purposely made easy to invert), and  
 662 we can calculate its dFIL. The second part can be thought of as a reconstruction attacker. As the  
 663 noising and denoising are specifically designed for the denoising to work well, we expect a mature,  
 664 pretrained diffusion model to give a very good attack quality. We used DDPM [72] pretrained with  
 665 CIFAR-10 from Google [73].

666 Figure 7 shows the result. The first column of each row shows the original image, and other columns  
 667 show the reconstruction of our DDPM-based attacker with different dFIL. We scale and show dFIL  
 668 with the same scale as Figure 5 as DDPM works with a different normalized image that produces dFIL  
 669 at a different scale. Our new attack provided an interesting result: the attack was able to reconstruct  
 670 conceptually similar images with the original image even when pixel-by-pixel reconstruction was  
 671 prohibited by high  $1/\text{dFIL}$ . For example, 7th row at  $1/\text{dFIL} = 49.5$  (6th column) successfully  
 672 reconstructed a white car with a red background, although the reconstruction MSE was high and the  
 673 design of the reconstructed car was nothing like the original image. The result shows that high-level  
 674 information of the image (*e.g.*, the color of the car/background, the orientation of the car, *etc.*) can  
 675 still be preserved after encoding with a relatively high  $1/\text{dFIL}$ , which is why it is possible to perform  
 676 downstream training/inference with a privately-encoded data without revealing the original data.

## 677 7.7 Additional figures and tables

Table 5: The reconstruction quality of an input is highly correlated with dFIL. Correct parts in bold.

| $1/\text{dFIL}$ | Reconstructed text (from split-early)                                    |
|-----------------|--------------------------------------------------------------------------|
| $10^{-5}$       | <b>it’s a charming and often affecting journey.</b>                      |
| 1               | <b>it’s cones charmingound</b><br><b>often affecting journey</b> closure |
| 10              | grounds yuki cum sign<br>recklessound fanuche pm stunt                   |

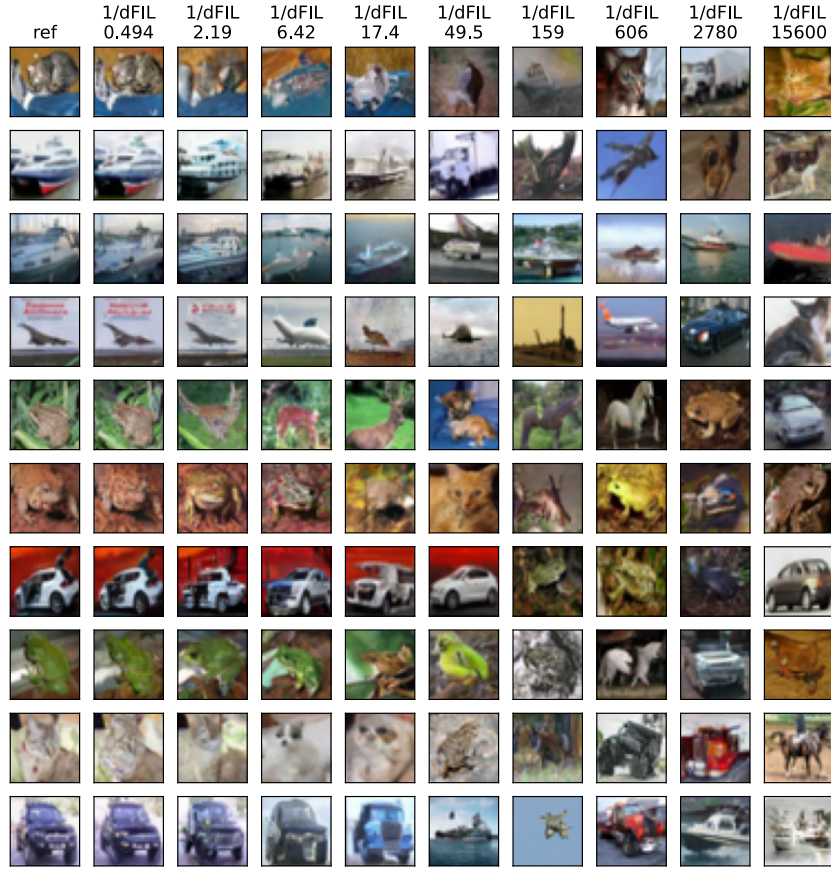

Figure 7: Results from DDPM [72]-based reconstruction attack. High  $1/dFIL$  prevents exact pixel-to-pixel reconstruction, but images that share some high-level features with the original image can be generated unless  $1/dFIL$  is not too high.

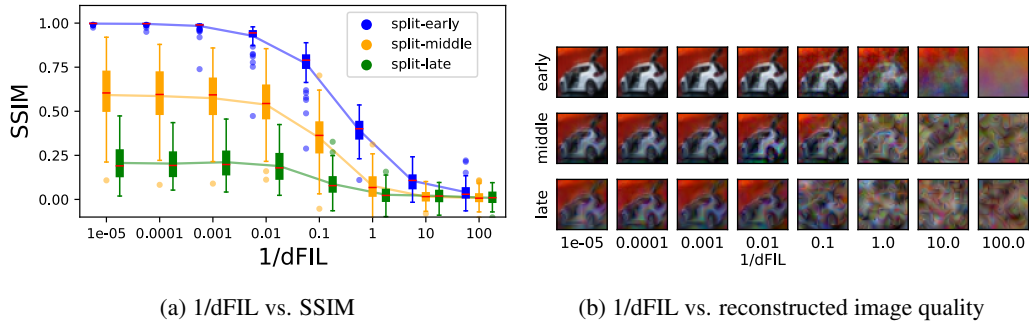

Figure 8: Optimizer-based attack with total variation (TV) prior [34] against our split inference system in Section 4. The trend is very similar to Figure 5.

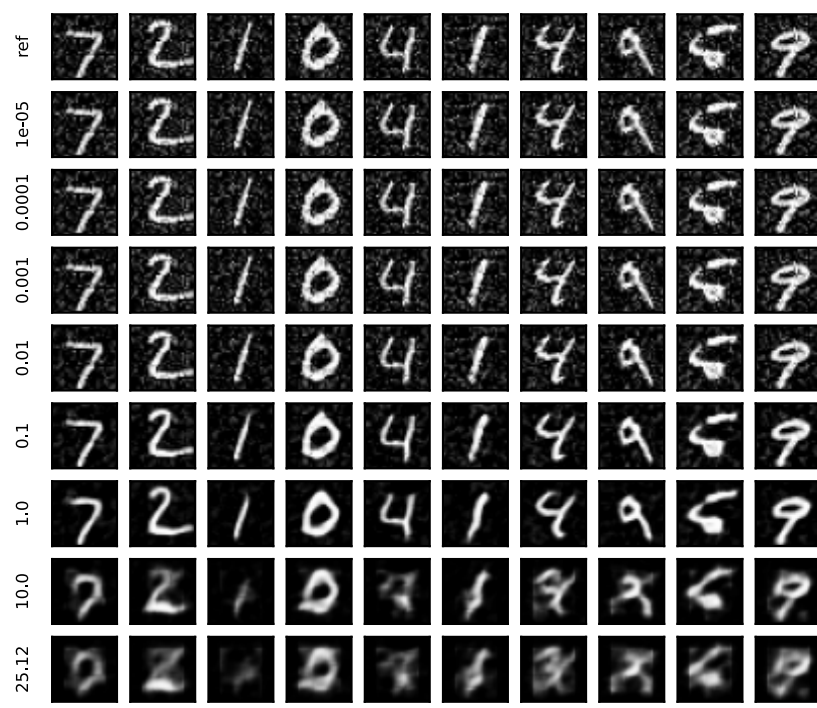

Figure 9: More reconstruction result of Figure 2

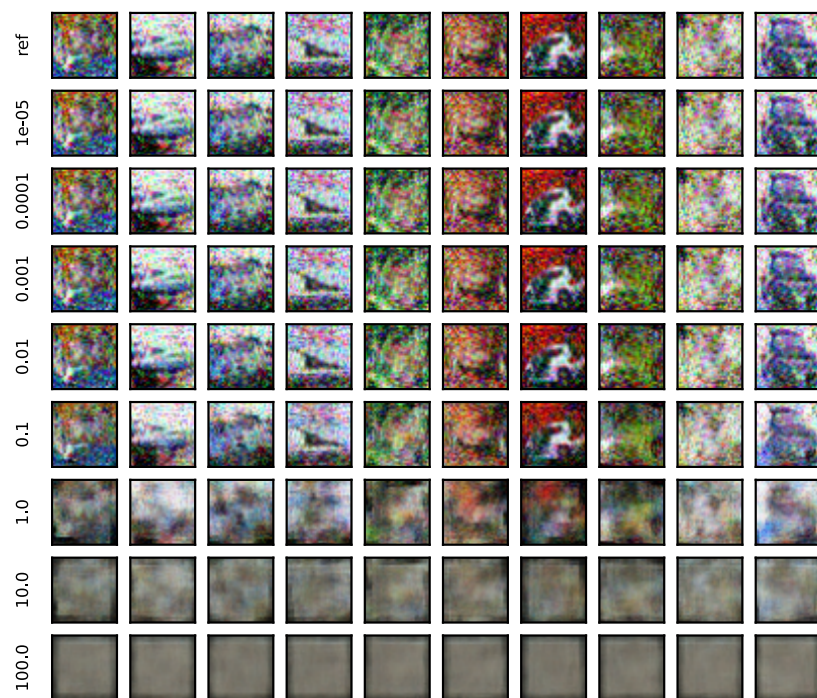

Figure 10: More reconstruction result of Figure 3



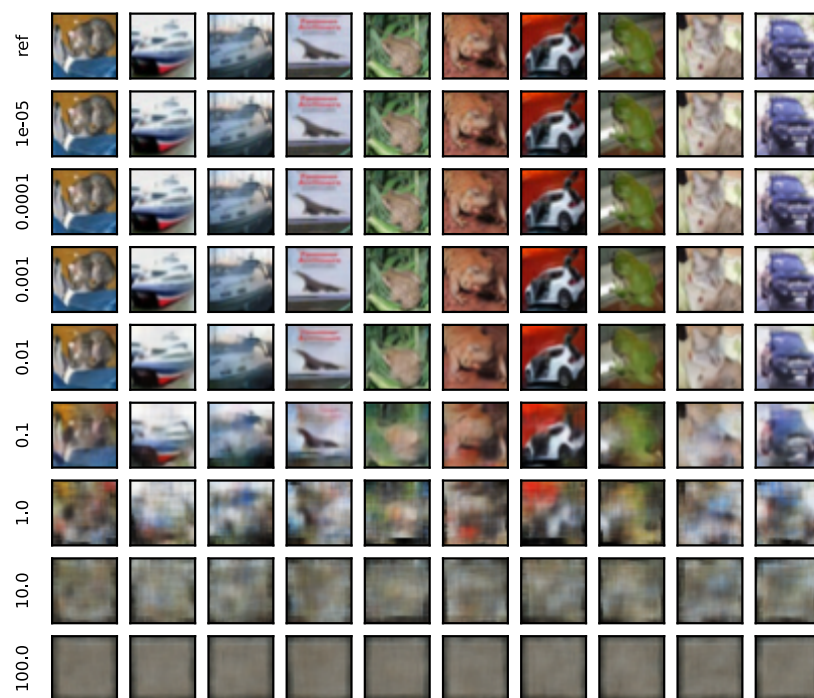

Figure 11: More reconstruction result of Figure 4.

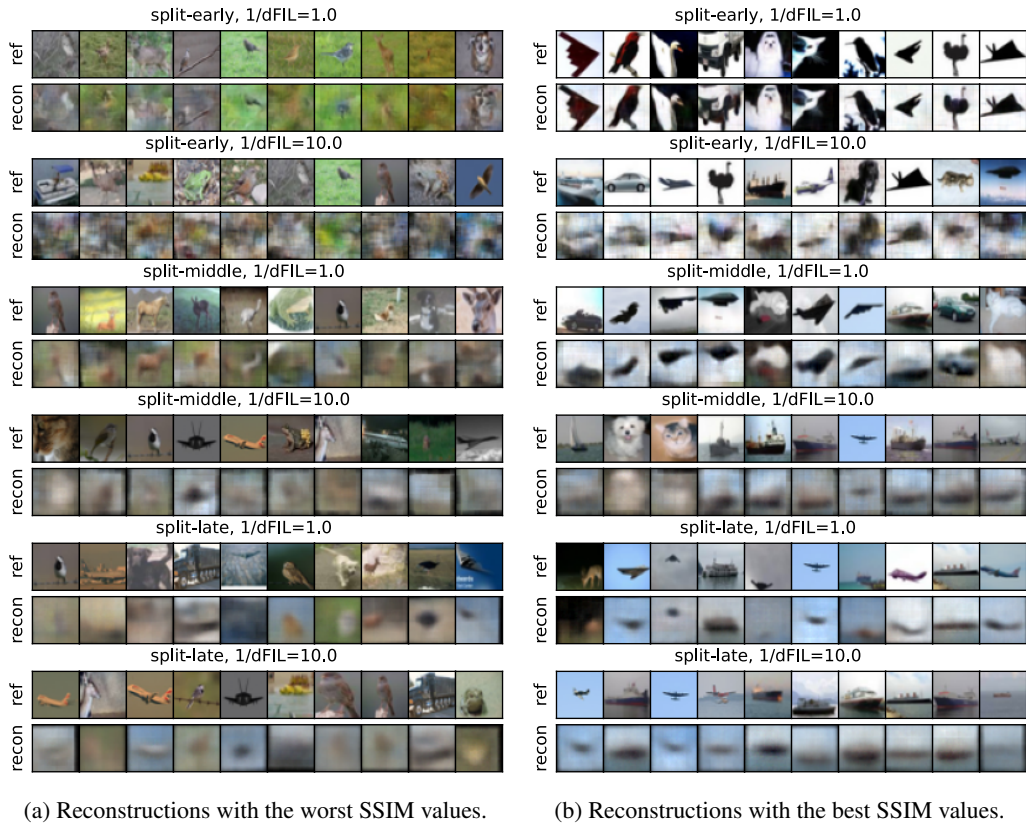

Figure 12: Ten reconstructions with the best and worst SSIM values for various setups. The result is an extension of Figure 5. Images with a simple shape and high color contrast tend to be reconstructed more easily, which matches our intuition. Omitting results from  $1/dFIL = 100$ , as no meaningful reconstruction was possible.

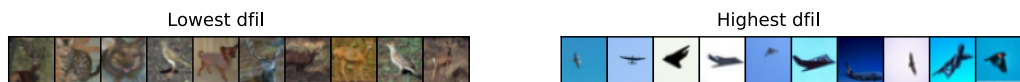

Figure 13: Ten images with the lowest and highest dFIL values, for split-middle setup in Figure 5. Images with high dFIL tend to have a simpler shape and a high color contrast, potentially being easier to reconstruct. Individual dFIL value of each samples can potentially be used to detect data that are more leaky.
